# Supplementary material for: A Fibrosis Biomarker Early Predicts Cardiotoxicity Due to Anthracycline-Based Breast Cancer Chemotherapy
Source: MDPI journal article supplement (doi:10.3390/cancers14122941), 2022-06-14
Supplement: s1 [file s1]

# A fibrosis biomarker early predicts cardiotoxicity due to anthracycline-based breast cancer chemotherapy

Ana de la Fuente, Marta Santisteban, Josep Lupón, José Manuel Aramendía, Agnes Díaz, Ana Santaballa, Amparo Hernández, Pilar Sepúlveda, Germán Cediell, Begoña López, José María López Picazo, Manuel M. Mazo, Gregorio Rábago, Juan José Gavira, Ignacio García-Bolao, Javier Díez, Arantxa González, Antoni Bayés-Genís and Susana Ravassa

**Table S1.** Clinical characteristics in BC patients at baseline, after completion of ACC therapy (post-ACC), and 3 months after ACC (3m-post-ACC) (CUN cohort).

|                                 | Baseline         | Post-ACC          | 3m-post-ACC        |
|---------------------------------|------------------|-------------------|--------------------|
| Renal function parameter        |                  |                   |                    |
| eGFR, mL/min/1.73m <sup>2</sup> | 95.3 ± 16.2      | 103 ± 16.8*       | 101 ± 18.7*        |
| Liver function parameters       |                  |                   |                    |
| AST, IU/L                       | 18.0 (15.0-20.0) | 19.0 (15.0-25.0)* | 20.0 (17.0-25.0)*  |
| ALT, IU/L                       | 13.0 (11.0-18.0) | 20.0 (15.0-36.0)* | 18.0 (14.0-27.5)*† |
| GGT, IU/L                       | 17.0 (13.0-26.0) | 24.0 (17.0-35.0)* | 19.0 (14.0-28.0)†  |
| ALP, IU/L                       | 60.0 (50.0-72.0) | 67.0 (55.0-78.0)* | 63.0 (51.0-76.0)†  |
| Echocardiographic parameters    |                  |                   |                    |
| GLS, %                          | -20.6±2.0        | -20.5±2.4         | -19.6±2.5†         |
| LVEF (3D), %                    | 63.8±5.3         | 63.3±4.5          | 62.3±5.9           |
| Biomarkers‡                     |                  |                   |                    |
| Cardiomyocyte stress/damage     |                  |                   |                    |
| NTproBNP, pg/mL                 | 41.4 (24.4-64.1) | 71.5 (42.9-117)*  | 57.1 (35.2-96.2)*  |
| hs-TnT, ng/L                    | 3.0 (3.0-4.5)    | 8.1 (4.0-11.1)*   | 8.0 (4.9-11.9)*    |
| Myocardial fibrosis             |                  |                   |                    |
| PICP, ng/mL                     | 72.0 (59.5-86.5) | 61.8 (51.1-74.0)  | 87.6 (69.2-119)*†  |
| CITP:MMP-1 ratio                | 1.5 (1.2-3.0)    | 2.1 (1.2-3.6)     | 2.0 (1.3-3.8)      |

BC means breast cancer; ACC, anthracycline-based cancer chemotherapy; eGFR, estimated glomerular filtration rate; AST, aspartate aminotransferase; ALT, alanine aminotransferase; GGT, gamma glutamyltransferase; ALP, alkaline phosphatase; 3D, three-dimensional; LVEF, left ventricular ejection fraction; NT-proBNP, amino-terminal pro-brain natriuretic peptide; hs-TnT, high sensitivity troponin T; PICP, procollagen type I C-terminal propeptide; CITP, collagen type I C-terminal telopeptide; MMP-1, matrix metalloproteinase-1. Quantitative variables are expressed as mean±SD or as median (IQR) and categorical variables as number (percentage). \*P<0.05 vs basal, †P<0.05 vs post-ACC. ‡P values in the biomarker analyses were adjusted according to the Benjamini and Hochberg multiple-test correction (5% FDR)

**Table S2.** Differences in echocardiographic parameters and in biomarkers after completion of ACC therapy (post-ACC) and 3 months after ACC in BC patients with presence versus those with absence of subclinical left ventricular dysfunction (LVD) at 3 months after ACC (CUN cohort).

|                              | Difference vs absence of subclinical LVD |               |         |             |                |         | P for interaction |
|------------------------------|------------------------------------------|---------------|---------|-------------|----------------|---------|-------------------|
|                              | Post-ACC                                 |               |         | 3m-post-ACC |                |         |                   |
|                              | Difference                               | 95% CI        | P value | Difference  | 95% CI         | P value |                   |
| Echocardiographic parameters |                                          |               |         |             |                |         |                   |
| GLS, %                       | 0.82                                     | 0.09 to 1.55  | 0.028   | 4.34        | 3.45 to 5.24   | <0.001  | <0.001            |
| LVEF (3D), %                 | 0.57                                     | -1.61 to 2.76 | 0.61    | -5.53       | -8.68 to -2.38 | 0.001   | <0.001            |
| Biomarkers (log2)            |                                          |               |         |             |                |         |                   |
| Cardiomyocyte stress/damage  |                                          |               |         |             |                |         |                   |
| NTproBNP, pg/mL              | 0.63                                     | 0.19 to 1.07  | 0.005   | 0.51        | -0.05 to 1.07  | 0.08    | 0.25              |
| hs-TnT, ng/L                 | -0.03                                    | -0.59 to 0.53 | 0.91    | 0.08        | -0.34 to 0.51  | 0.70    | 0.89              |
| Myocardial fibrosis          |                                          |               |         |             |                |         |                   |
| PICP, ng/mL                  | -0.01                                    | -0.21 to 0.20 | 0.93    | 0.70        | 0.46 to 0.95   | <0.001* | <0.001*           |
| CITP:MMP-1 ratio             | -0.09                                    | -0.57 to 0.38 | 0.71    | 0.05        | -0.53 to 0.63  | 0.88    | 0.60              |

Abbreviations as in table S1. \*Significant after Benjamini and Hochberg multiple-test correction (5% FDR) in the biomarker analyses

**Table S3.** Echocardiographic parameters and biomarkers in BC patients at baseline, after completion of ACC therapy (post-ACC), 3 months post-ACC (3m-post-ACC) and 12 months post-ACC (12m-post-ACC).

|                              | Baseline         | Post-ACC         | 3m-post-ACC       | 12m-post-ACC      |
|------------------------------|------------------|------------------|-------------------|-------------------|
| <b>CUN cohort</b>            |                  |                  |                   |                   |
| Echocardiographic parameters |                  |                  |                   |                   |
| GLS, %                       | -20.6±2.0        | -20.7±2.4        | -19.7±2.1*†       | -19.5±2.8*†       |
| LVEF (3D), %                 | 63.3±4.9         | 63.4±4.4         | 62.7±5.4          | 61.5±7.3          |
| Biomarkers&                  |                  |                  |                   |                   |
| Cardiomyocyte stress/damage  |                  |                  |                   |                   |
| NTproBNP, pg/mL              | 39.0 (24.1-64.2) | 68.4 (42.9-117)* | 54.9 (34.2-95.5)* | 46.0 (21.0-78.5)  |
| hs-TnT, ng/L                 | 3.0 (3.0-4.5)    | 8.6 (4.0-12.0)*  | 7.5 (4.3-10.0)*   | 4.6 (3.0-6.4)*†   |
| Myocardial fibrosis          |                  |                  |                   |                   |
| PICP, ng/mL                  | 66.6 (59.0-87.5) | 64.6 (51.9-74.3) | 85.1 (69.8-115)*† | 90.7 (70.8-117)*† |
| <b>HULAFE cohort</b>         |                  |                  |                   |                   |
| Echocardiographic parameters |                  |                  |                   |                   |
| GLS, %                       | -16.5±1.9        | -15.5±2.5*       | -15.2±2.0*        | -15.7±2.6         |
| LVEF (2D), %                 | 66.9±5.8         | 65.0±5.8         | 62.5±5.5*         | 61.6±6.3*         |
| Biomarkers*                  |                  |                  |                   |                   |
| Cardiomyocyte stress/damage  |                  |                  |                   |                   |
| NT-proBNP, pg/mL             | 60.6 (29.5-99.5) |                  | 74.2 (40.7-120)*  | 94.1 (55.0-157)*† |
| hs-TnT, ng/L                 | 6.9 (3.0-10.6)   |                  | 12.6 (8.9-19.2)*  | 9.3 (7.1-11.4)*†  |
| Myocardial fibrosis          |                  |                  |                   |                   |
| PICP, ng/mL                  | 73.3 (57.8-99.4) |                  | 87.7 (66.8-113)*  | 93.3 (80.4-123)*  |

Abbreviations as in table S1. Quantitative variables are expressed as mean±SD or as median (IQR) and categorical variables as number (percentage) \*P<0.05 vs basal, †P<0.05 vs post-ACC, ‡P<0.05 vs 3m-post-ACC. \*P values in the biomarker analyses were adjusted according to the Benjamini and Hochberg multiple-test correction (5% FDR).

**Table S4.** Baseline clinical characteristics of BC patients categorized according to the absence or presence of cardiotoxicity at 12 months after completion of ACC therapy (CUN cohort).

|                             | Cardiotoxicity   |                  | P value |
|-----------------------------|------------------|------------------|---------|
|                             | No (n=55)        | Yes (n=10)       |         |
| Oncologic parameters, n (%) |                  |                  |         |
| Breast cancer side          |                  |                  |         |
| Left                        | 31 (56.4)        | 6 (60.0)         | 0.90    |
| Right                       | 23 (41.8)        | 4 (40.0)         |         |
| Bilateral                   | 1 (1.8)          | 0 (0.0)          |         |
| Ki67, %                     | 40.7 ± 25.2      | 42.5 ± 27.4      | 0.84    |
| HER2 positive, n (%)        | 14 (25.5)        | 3 (30.0)         | 0.76    |
| Other treatments, n(%)      |                  |                  |         |
| Carboplatin                 | 17 (30.9)        | 2 (20.0)         | 0.49    |
| Anti-HER2                   |                  |                  |         |
| Trastuzumab                 | 9 (16.4)         | 0 (0.0)          | 0.10    |
| Trastuzumab+Pertuzumab      | 5 (9.1)          | 3 (30.0)         |         |
| Radiotherapy, n(%)          | 46 (83.6)        | 9 (90.0)         | 0.61    |
| Surgery before ACC, n (%)   | 18 (32.7)        | 2 (20.0)         | 0.71    |
| Liver function parameters   |                  |                  |         |
| AST, IU/L                   | 17.5 (14.0-20.0) | 17.5 (13.8-20.3) | 0.69    |
| ALT, IU/L                   | 13.0 (11.5-18.5) | 12.0 (9.5-14.0)  | 0.78    |
| GGT, IU/L                   | 17.0 (13.0-27.0) | 17.0 (14.8-42.3) | 0.33    |
| ALP, IU/L                   | 61.0 (51.0-75.0) | 53.0 (38.5-66.0) | 0.10    |
| Biomarkers                  |                  |                  |         |
| CITP:MMP1 ratio             | 1.5 (1.2-3.3)    | 2.0 (1.2-3.2)    | 0.85    |

Abbreviations as in table S1. Quantitative variables are expressed as mean±SD or median (inter-quartile range) and categorical variables as number (percentage).
